# Supplementary material
Source: publisher figshare collection journal article supplement (https://acs.figshare.com/ndownloader/files/14640776)
Supplement: Supplementary file 1 [file 14640776]

## Supporting Information

### **Ultrafine Pt Nanoparticles Stabilized by MoS<sub>2</sub> / N-doped Graphene as Durable Electrocatalyst for Alcohol Oxidation and Oxygen Reduction Reactions**

S. Ramakrishnan<sup>a</sup>, Mohanraju Karupppannan<sup>b</sup>, Mohanraj Vinothkannan<sup>c</sup>, K. Ramachandran<sup>a</sup>, Oh Joong Kwon<sup>b</sup>, Dong Jin Yoo<sup>a, c,\*</sup>

<sup>a</sup>R&D Education center for whole life cycle R&D of fuel cell systems, Chonbuk National University, Jeollabuk-do 54896, Republic of Korea

<sup>b</sup>Department of Energy and Chemical Engineering, Incheon National University, 119 Academy-ro, Yeonsu-Gu, Incheon 22012, Republic of Korea

<sup>c</sup>Department of Life Science, Graduate School of Department of Energy Storage/Conversion Engineering, and Hydrogen and Fuel Cell Research Center, Chonbuk National University, Jeollabuk-do 54896, Republic of Korea

---

*\*Corresponding authors:*

Email address: [djyoo@jbnu.ac.kr](mailto:djyoo@jbnu.ac.kr) (Prof. Dong Jin Yoo);

---

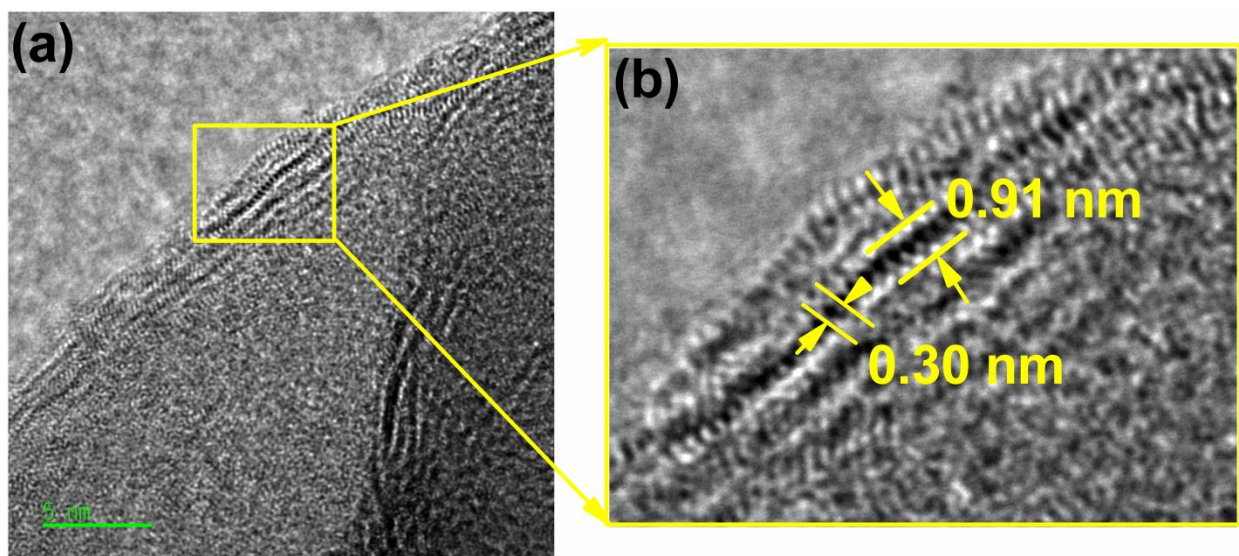

**Figure S1.** (a-b) HRTEM image and d-space value of MoS<sub>2</sub>/NrGO.

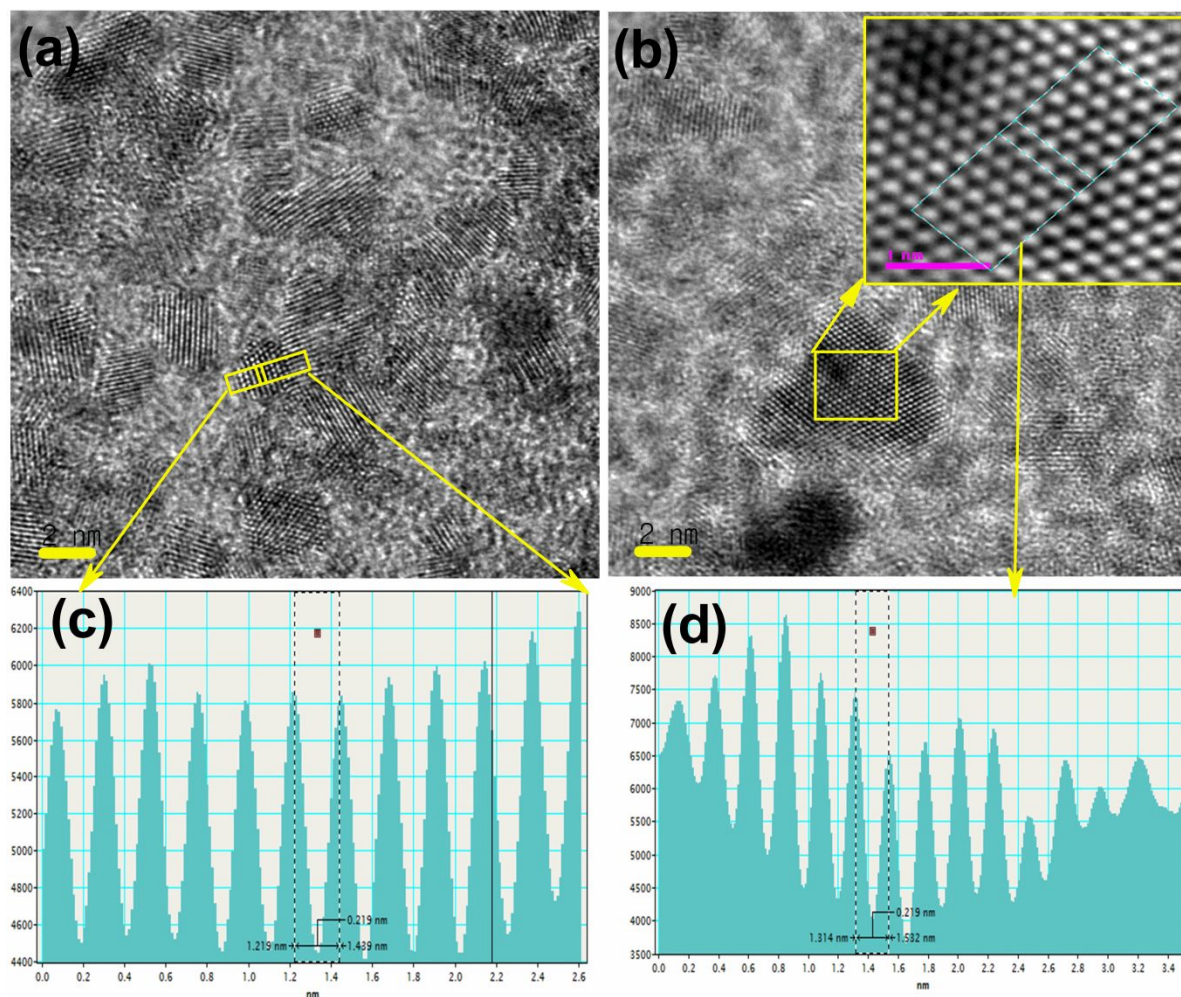

**Figure S2.** (a-b) HR TEM images and (c-d) d-space line profile for Pt@MoS<sub>2</sub>/NrGO.

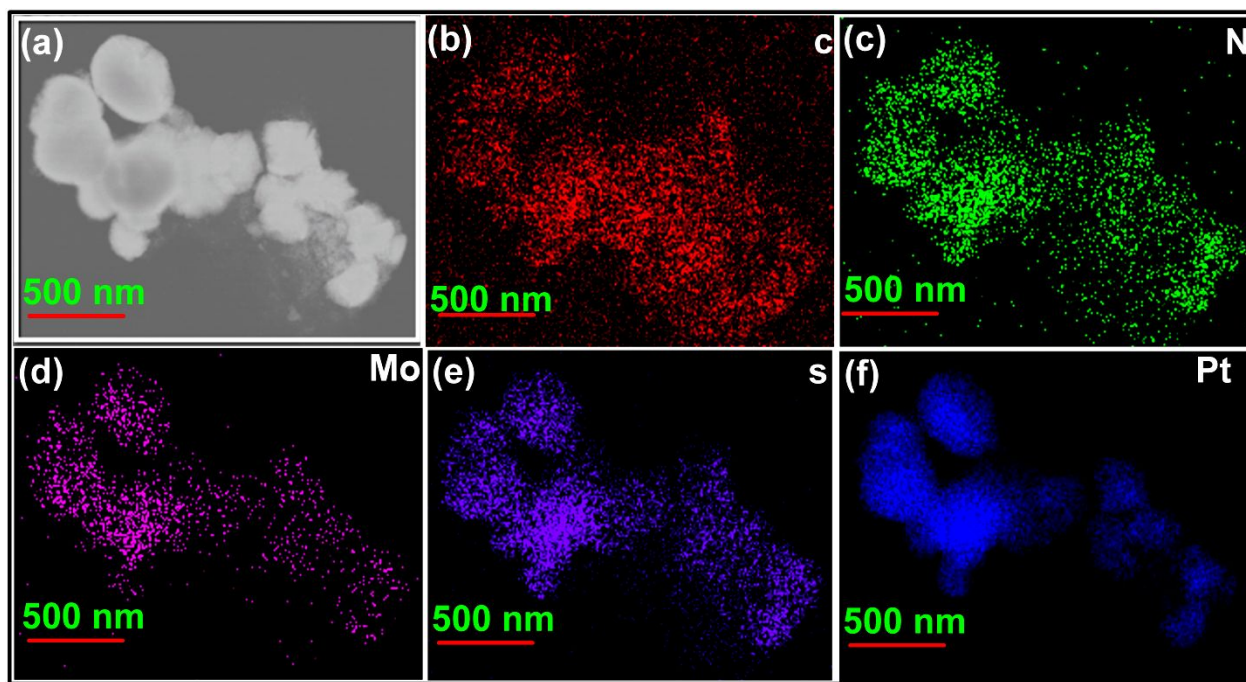

**Figure S3.** HAADF-STEM images of (a) Pt@MoS<sub>2</sub>/NrGO and (b–f) the corresponding elemental mapping images.

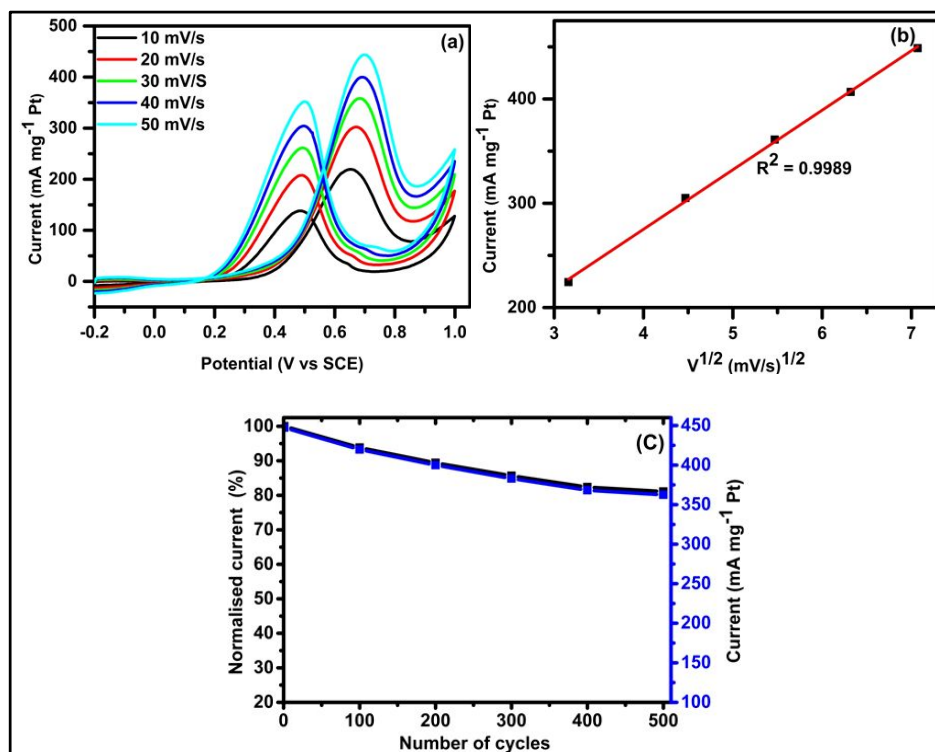

**Figure S4.** (a) CV curves of Pt@MoS<sub>2</sub>/NrGO as a function of different scan rate recorded in 1 M methanol and 0.5 M H<sub>2</sub>SO<sub>4</sub>, (b) calibration plot of peak current density Vs square scan rate (c) Normalized current degradation as a function of cycles recorded in 1 M methanol and 0.5 M H<sub>2</sub>SO<sub>4</sub>.

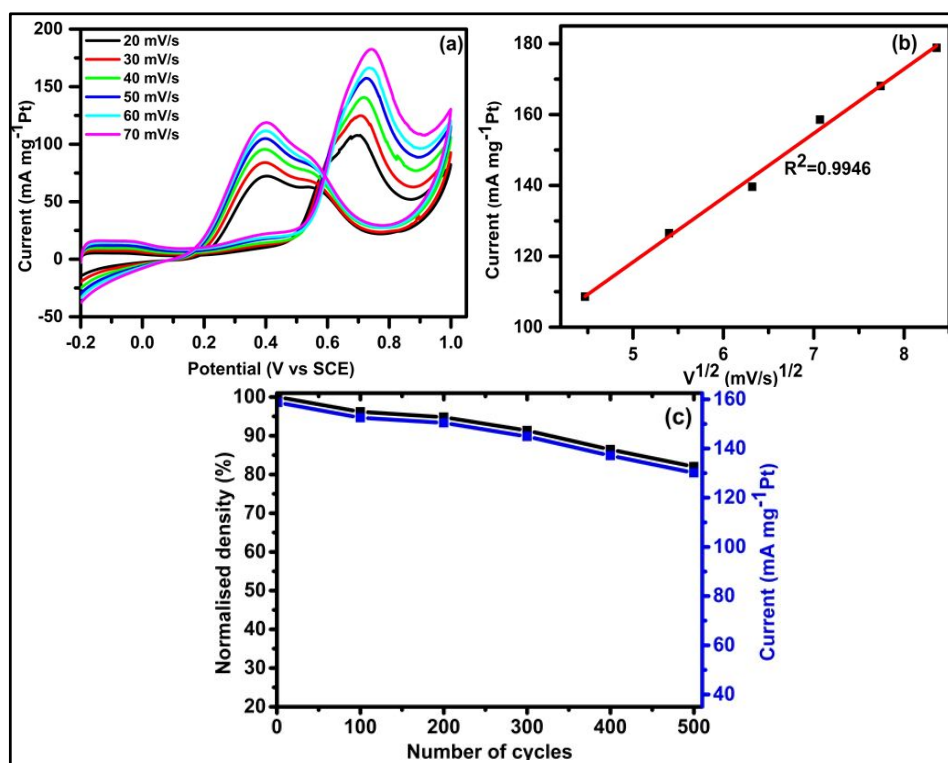

**Figure S5.** (a) CV curves of Pt@MoS<sub>2</sub>/NrGO as a function of different scan rate recorded in 1 M ethylene glycol and 0.5 M H<sub>2</sub>SO<sub>4</sub>, (b) calibration plot of peak current density Vs square scan rate (c) Normalized current degradation as a function of cycles recorded in 1 M ethylene glycol and 0.5 M H<sub>2</sub>SO<sub>4</sub>.



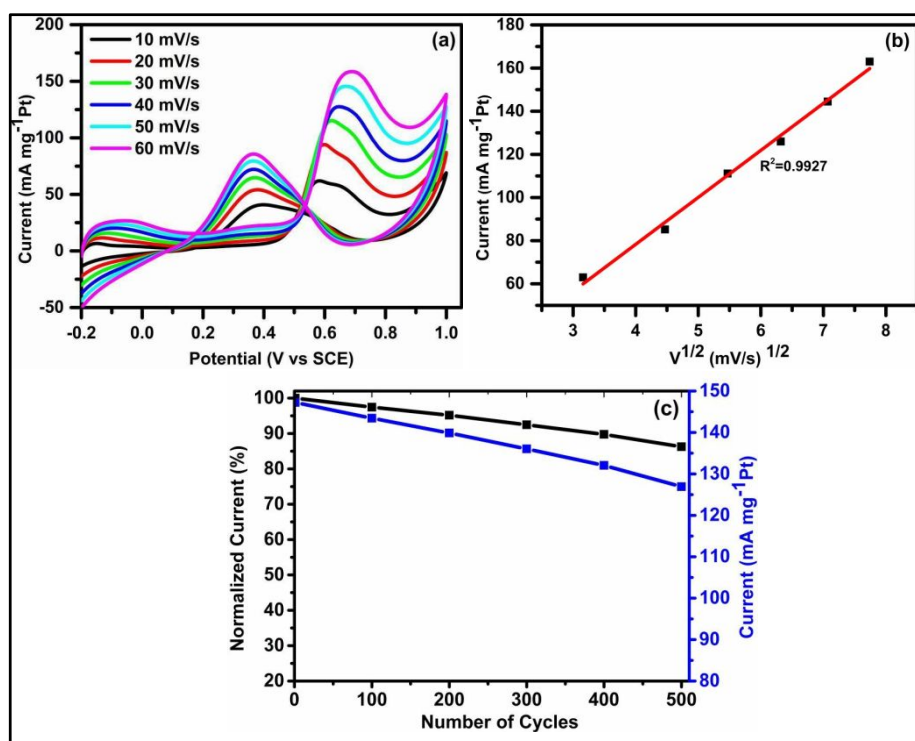

**Figure S6.** (a) CV curves of Pt@MoS<sub>2</sub>/NrGO as a function of different scan rate recorded in 1 M glycerol and 0.5 M H<sub>2</sub>SO<sub>4</sub>, (b) calibration plot of peak current density Vs square scan rate (c) Normalized current degradation as a function of cycles recorded in 1 M glycerol and 0.5 M H<sub>2</sub>SO<sub>4</sub>.

The Figure S4-S6(a-b) shows the plot between current density and square root of scan rates ( $V^{1/2}$ ) of electro-oxidation of methanol, Ethylene glycol and glycerol using Pt@MoS<sub>2</sub>/NrGO catalyst and its fitting shows good linear relationship with R<sup>2</sup> values are 0.9989, 0.9946 & 0.9927 corresponding to electro oxidation methanol, ethylene glycol and glycerol respectively. The

results are illustrates the alcohols oxidation reaction on Pt@MoS<sub>2</sub>/NrGO electrode is diffusion controlled process.

**Table S1.** Comparisons of exiting electrocatalysts for alcohol oxidation.

| Electrode Materials                     | Fuel              |                   | Electrolyte                    |                   | Current density (mA mg <sup>-1</sup> Pt) | Reference    |
|-----------------------------------------|-------------------|-------------------|--------------------------------|-------------------|------------------------------------------|--------------|
|                                         | Type              | Concentration (M) | Type                           | Concentration (M) |                                          |              |
| Au@Pt/MoS <sub>2</sub>                  | Methanol          | 1                 | KOH                            | 0.5               | 6240                                     | 1            |
| Pd-MoS <sub>2</sub>                     | Methanol          | 1                 | KOH                            | 0.5               | 433.5                                    | 2            |
| Pt-MoS <sub>2</sub> /N doped bio carbon | Methanol          | 0.5               | H <sub>2</sub> SO <sub>4</sub> | 0.5               | 1030.2                                   | 3            |
| Pt-Ce <sub>2-x</sub> /GNS               | Methanol          | 1                 | KOH                            | 1                 | 1159                                     | 4            |
|                                         | Ethylene glycol   | 1                 | KOH                            | 1                 | 3260                                     |              |
|                                         | Glycerol          | 1                 | KOH                            | 1                 | 2550                                     |              |
| PdPb alloy nanotubes                    | Ethylene glycol   | 1                 | KOH                            | 1                 | 4060                                     | 5            |
|                                         | Glycerol          | 1                 | KOH                            | 1                 | 2220                                     |              |
| PdAu/NG                                 | Ethylene glycol   | 1                 | KOH                            | 1                 | 12800                                    | 6            |
|                                         | Glycerol          | 1                 | KOH                            | 1                 | 8700                                     |              |
| graphene-MWCNTs/Pt                      | Methanol          | 1                 | H <sub>2</sub> SO <sub>4</sub> | 0.5               | 168.41                                   | 7            |
|                                         | Ethylene glycerol | 1                 | H <sub>2</sub> SO <sub>4</sub> | 0.5               | 153.13                                   |              |
| Pd/RGO                                  | Ethylene glycerol | 0.5               | KOH                            | 0.5               | 33.7                                     | 8            |
|                                         | Glycerol          | 0.5               | KOH                            | 0.5               | 25.1                                     |              |
| Pt@MoS <sub>2</sub> /NrGO               | Methanol          | 1                 | H <sub>2</sub> SO <sub>4</sub> | 0.5               | 448                                      | Present work |
|                                         | Ethylene glycol   | 1                 | H <sub>2</sub> SO <sub>4</sub> | 0.5               | 158                                      |              |
|                                         | Glycerol          | 1                 | H <sub>2</sub> SO <sub>4</sub> | 0.5               | 147                                      |              |

### Koutecky–Levich (K–L) plots

Using Equation (1) Koutecky–Levich (K–L) plots are derived from plots of inverse of current density ( $i_d^{-1}$ ) and inverse of the square root of the rotation rate ( $\omega^{-1/2}$ )

$$I_K = \frac{I_d I}{I_d - I} \quad (1)$$



Where  $I$  is experimentally measured current density

$I_K$  is Kinetic current density

$I_d$  is Diffusion limited current density

### **Number of electron calculation**

$$0.62nFA D^{2/3} C v^{-1/6} \omega^{1/2} \quad (2)$$

$A$  is Geometric area of electrode ( $0.19625 \text{ cm}^2$ )

$C$  -is bulk  $O_2$  solubility of  $1.18 \times 10^{-6} \text{ mol cm}^{-3}$

$D_{O_2}$  is diffusion co-efficient of oxygen of  $1.9 \times 10^{-5} \text{ cm}^2 \text{ s}^{-1}$

$v$  is Kinetic viscosity of  $8.93 \times 10^{-3} \text{ cm}^2 \text{ s}^{-1}$  in  $0.1 \text{ M HClO}_4$

$n$  is number of electron transfer per oxygen molecular during the ORR

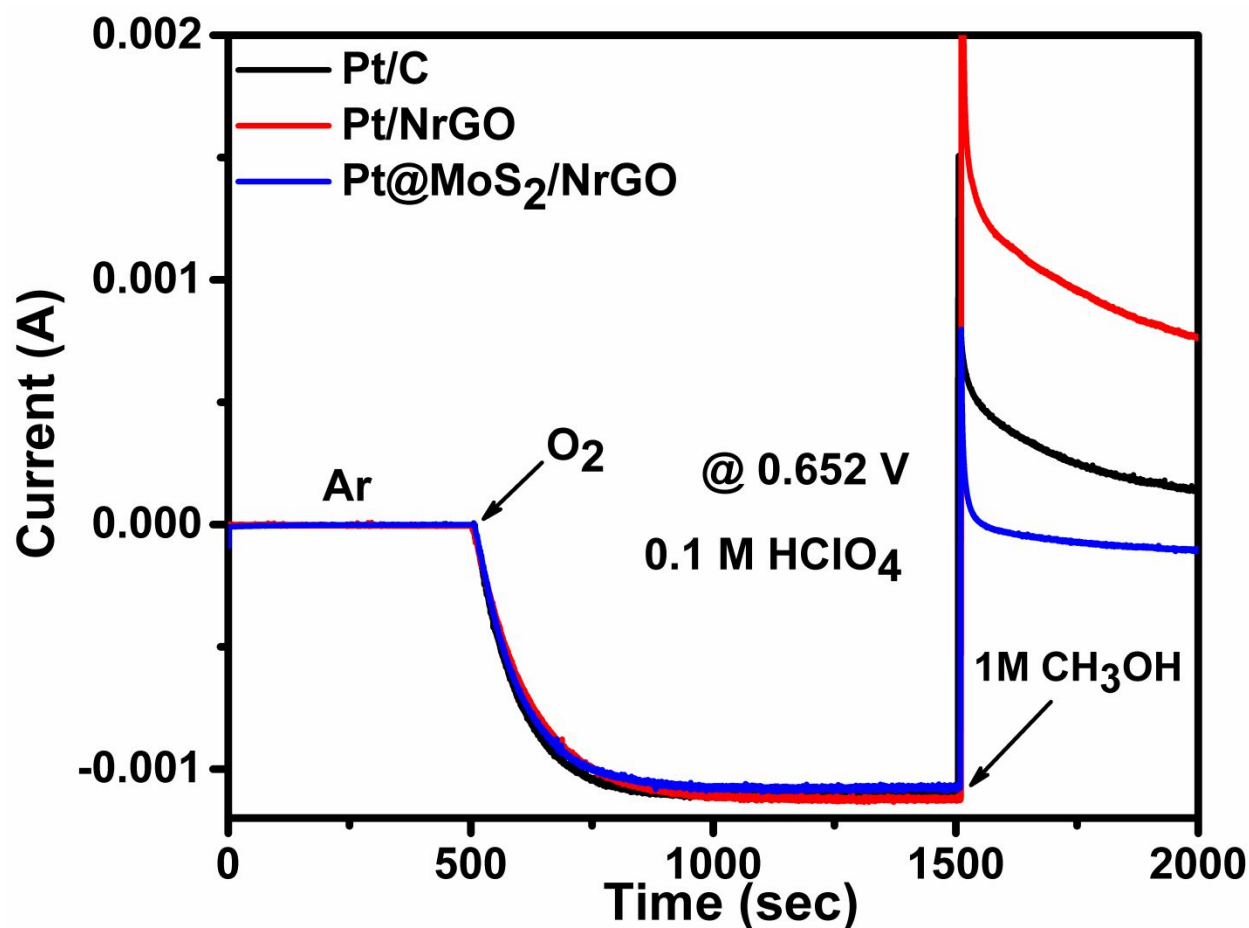

**Figure S7.** Chronoamperometry response of Pt@MoS<sub>2</sub>/NrGO, Pt@NrGO and Pt/C electrode in presence of Ar / O<sub>2</sub> / O<sub>2</sub> + 1 M CH<sub>3</sub>OH in 0.1 M HClO<sub>4</sub> at 1600 rpm.

Furthermore, the methanol tolerance study was also performed for Pt@MoS<sub>2</sub>/NrGO, Pt@NrGO and Pt/C electrodes using chronoamperometry techniques. The modified electrodes were polarized with fixed potential of 0.652 V vs RHE upto 2000 s with rotation of 1600 rpm in 0.1 M HClO<sub>4</sub>. The electrolyte was purged with argon upto 500 seconds and oxygen purged from 500 to 2000 seconds and then methanol introduced at 1500 seconds. In Figure S7, Pt@MoS<sub>2</sub>/NrGO, Pt@NrGO and Pt/C electrodes shows almost similar oxygen reduction response from 500 to 1500 s, but once introduce the methanol at 1500 s, the ORR activity was significantly disturbed. It is identified that Pt@MoS<sub>2</sub>/NrGO electrode has less disturbance than others and shows reduction current at 2000 s. This study reveals that Pt@MoS<sub>2</sub>/NrGO has low methanol tolerance properties, even though it is better than commercial Pt/C and Pt/NrGO electrocatalysts.

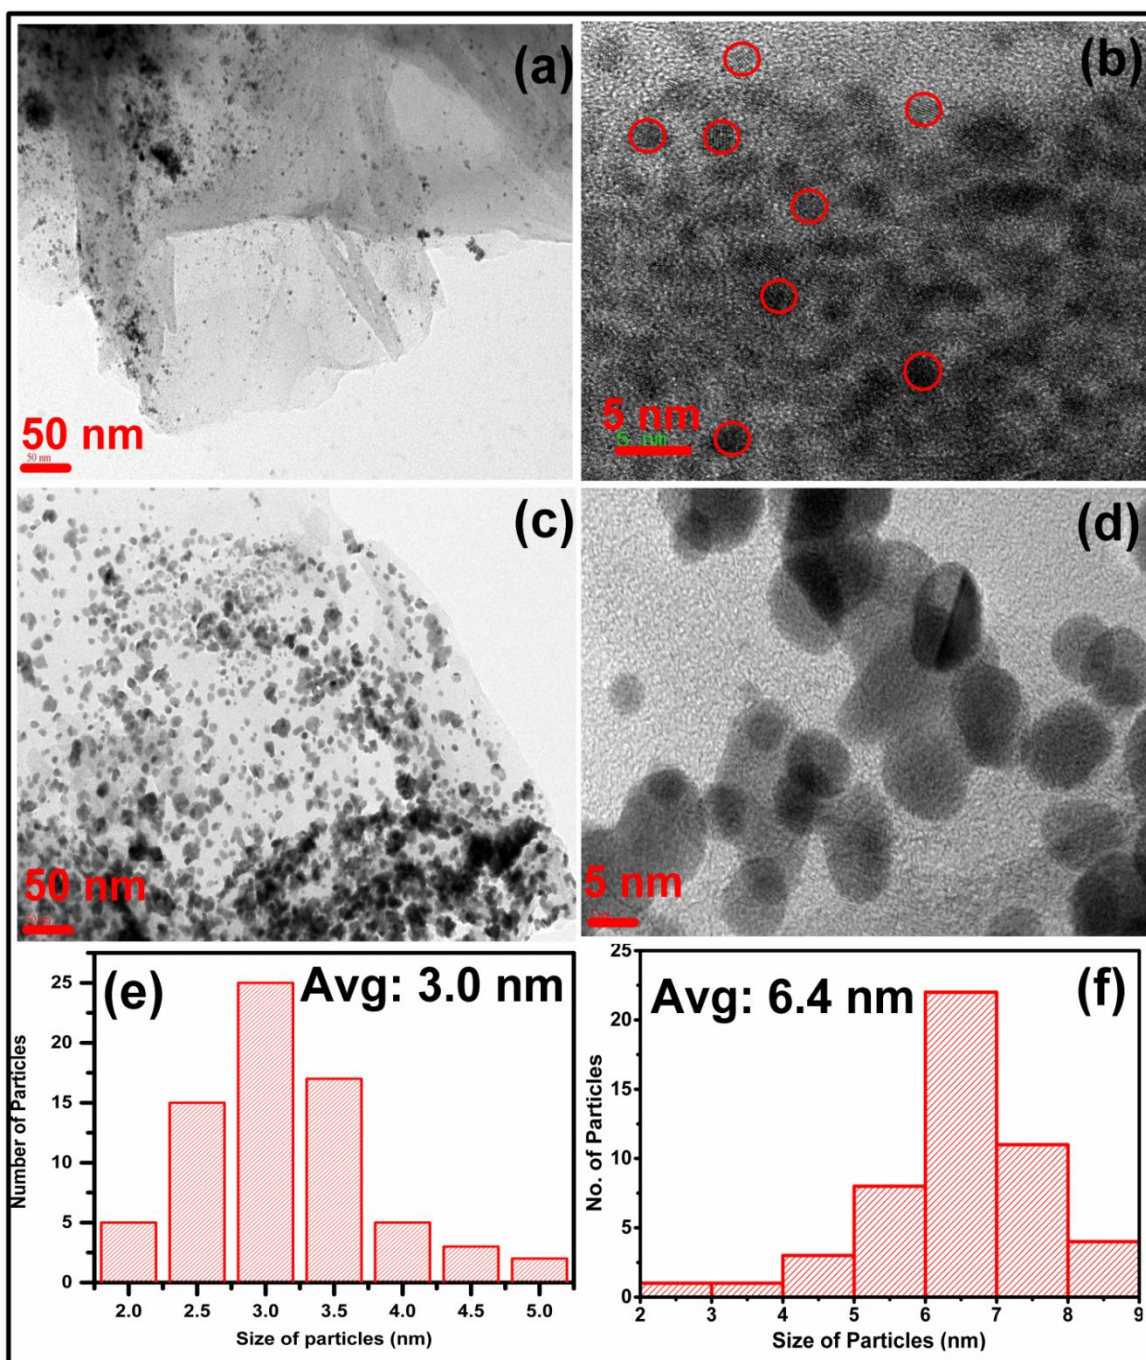

**Figure S8.** TEM images of Pt@MoS<sub>2</sub>/NrGO (a and b) taken before 30000 potential cycles and (c and d) taken after 30000 potential cycles; corresponding particle size histograms of (e) before 30000 potential cycles and (f) after 30000 potential cycles.



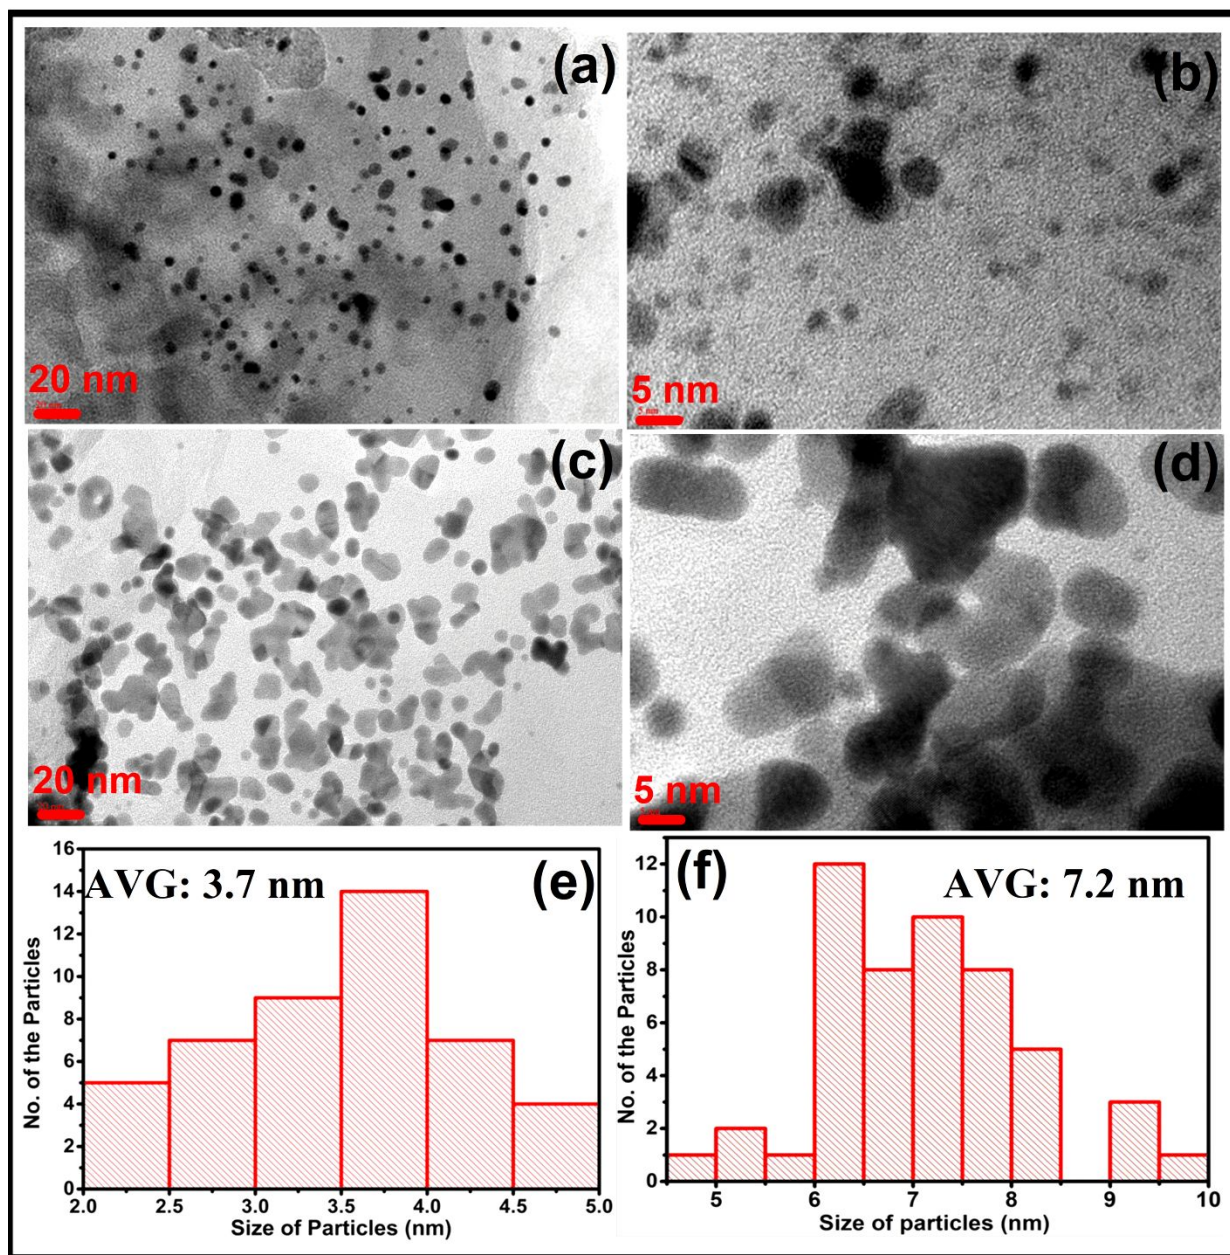

**Figure S9.** TEM images of Pt@NrGO (a and b) taken before 30000 potential cycles and (c and d) taken after 30000 potential cycles; corresponding particle size histograms of (e) before 30000 potential cycles and (f) after 30000 potential cycles.

## References

- S1. Su, S.; Zhang, C.; Yuwen, L.; Liu, X.; Wang, L.; Fan, C.; Wang, L., Uniform Au@Pt core-shell nanodendrites supported on molybdenum disulfide nanosheets for the methanol oxidation reaction. *Nanoscale* **2016**, 8 (1), 602-608.
- S2. Yuwen, L.; Xu, F.; Xue, B.; Luo, Z.; Zhang, Q.; Bao, B.; Su, S.; Weng, L.; Huang, W.; Wang, L., General synthesis of noble metal (Au, Ag, Pd, Pt) nanocrystal modified MoS<sub>2</sub> nanosheets and the enhanced catalytic activity of Pd-MoS<sub>2</sub> for methanol oxidation. *Nanoscale* **2014**, 6 (11), 5762-5769.
- S3. Tang, B.; Lin, Y.; Xing, Z.; Duan, Y.; Pan, S.; Dai, Y.; Yu, J.; Zou, J., Porous coral reefs-like MoS<sub>2</sub>/nitrogen-doped bio-carbon as an excellent Pt support/co-catalyst with promising catalytic activity and CO-tolerance for methanol oxidation reaction. *Acta .Electrochim* **2017**, 246, 517-527.
- S4. He, Q.; Shen, Y.; Xiao, K.; Xi, J.; Qiu, X., Alcohol electro-oxidation on platinum-ceria/graphene nanosheet in alkaline solutions. *Int. J. Hydrog. Energy* **2016**, 41 (45), 20709-20719.
- S5. Xu, H.; Song, P.; Fernandez, C.; Wang, J.; Zhu, M.; Shiraishi, Y.; Du, Y., Sophisticated Construction of Binary PdPb Alloy Nanocubes as Robust Electrocatalysts toward Ethylene Glycol and Glycerol Oxidation. *ACS Appl. Mater. Interfaces* **2018**, 10 (15), 12659-12665.
- S6. Zhai, C.; Hu, J.; Zeng, L.; Fu, N.; Du, Y.; Zhu, M., One-pot fabrication of Nitrogen-doped graphene supported binary palladium-silver nanocapsules enable efficient ethylene glycol electrocatalysis. *J. Colloid Interface Sci.* **2019**, 535, 392-399.
- S7. Gorle, D. B.; Kulandainathan, M. A., One-pot synthesis of highly efficient graphene based three-dimensional hybrids as catalyst supporting materials for electro-oxidation of liquid fuels. *J. Mater. Chem. A* **2017**, 5 (29), 15273-15286.
- S8. Li, S.-S.; Hu, Y.-Y.; Feng, J.-J.; Lv, Z.-Y.; Chen, J.-R.; Wang, A.-J., Rapid room-temperature synthesis of Pd nanodendrites on reduced graphene oxide for catalytic oxidation of ethylene glycol and glycerol. *Int. J. Hydrog. Energy* **2014**, 39 (8), 3730-3738.
